# Supplementary material for: Reshaping the binding pocket of purine nucleoside phosphorylase for improved production of 2-halogenated-2′-deoxyadenosines
Source: Royal Society of Chemistry journal article supplement (doi:10.1039/d0cy02424d), 2021-01-01
Supplement: d0cy02424d1.pdf [file d0cy02424d1.pdf]

## **Reshaping the binding pocket of purine nucleoside phosphorylase for improved production of 2-halogenated-2'-deoxyadenosine**

Gaofei Liu<sup>b</sup>, Xin Tong<sup>b</sup>, Jialing Wang<sup>a</sup>, Bin Wu<sup>b</sup>, Jianlin Chu<sup>\*a</sup>, Yongchan Jian and Bingfang He<sup>\*a</sup>

<sup>a</sup> School of Pharmaceutical Sciences, Nanjing Tech University, No. 30 Puzhu South Road, Jiangbei New Area, Nanjing 211800, China.

<sup>b</sup> College of Biotechnology and Pharmaceutical Engineering, Nanjing Tech University, No. 30 Puzhu South Road, Jiangbei New Area, Nanjing 211800, China.

\* Correspondence: [cjl2fl@126.com](mailto:cjl2fl@126.com); [bingfanghe@njtech.edu.cn](mailto:bingfanghe@njtech.edu.cn);

Tel.: +86-025-58139902

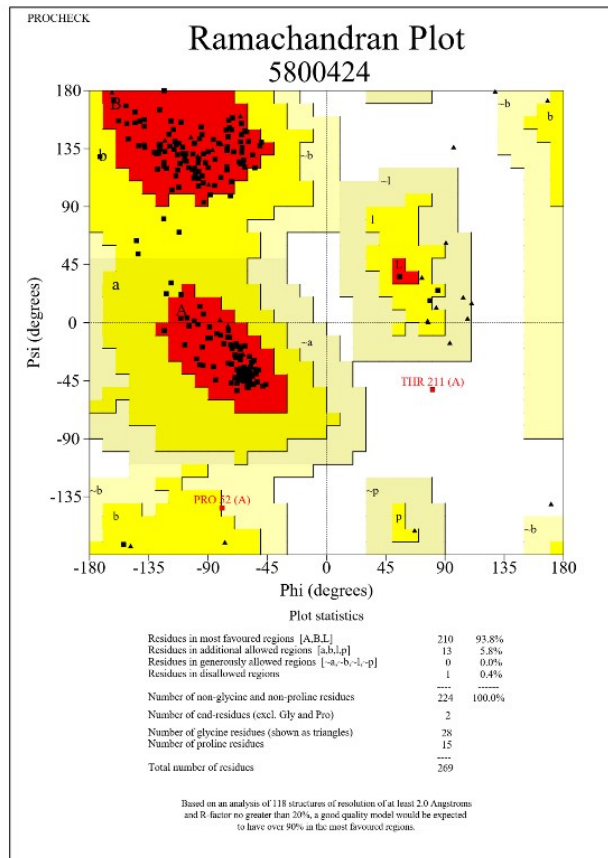

**Fig. S1** Ramachandran plot analysis of *Am*PNP model

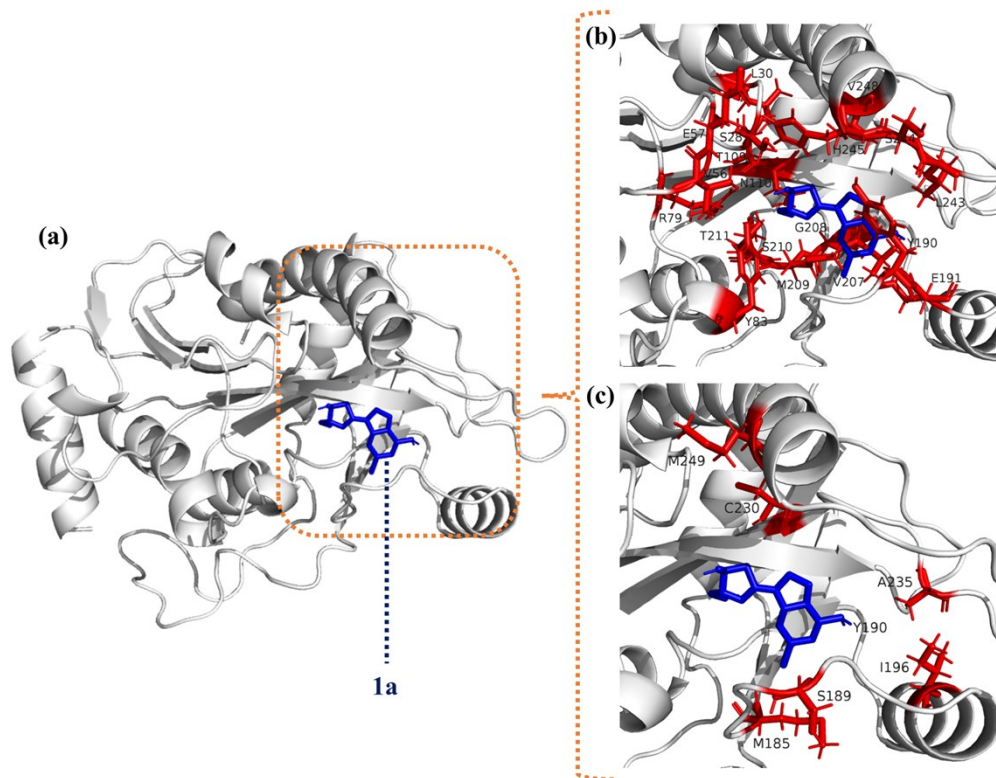

**Fig. S2** Potential randomization sites for *AmPNP* evolution. **(a)** *AmPNP* binding with 1a. **(b)** Overview of the potential mutagenesis sites surrounding the binding pocket of *AmPNP*. Randomization sites are showed as red sticks, and the compound 1a is showed as blue stick.

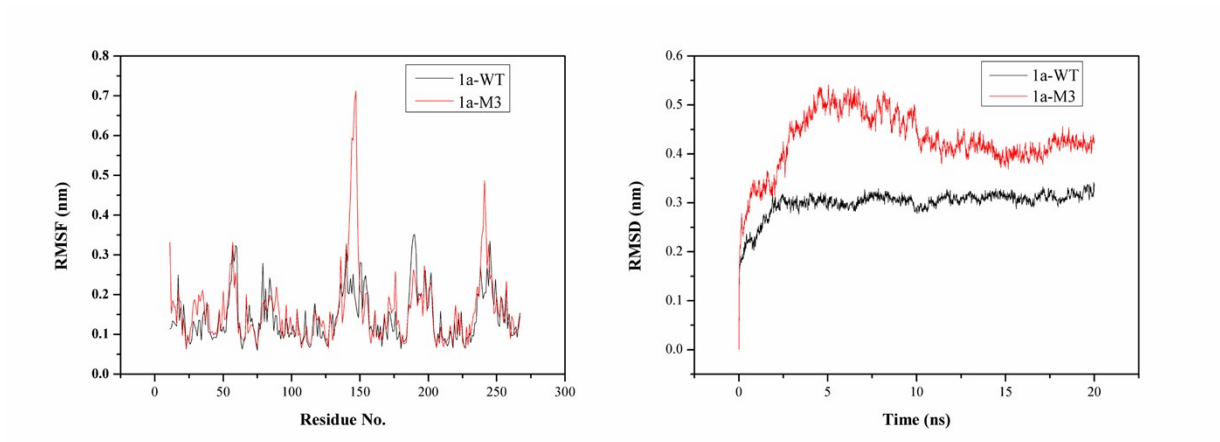

**Fig S3.** RMSF and RMSD analysis results.

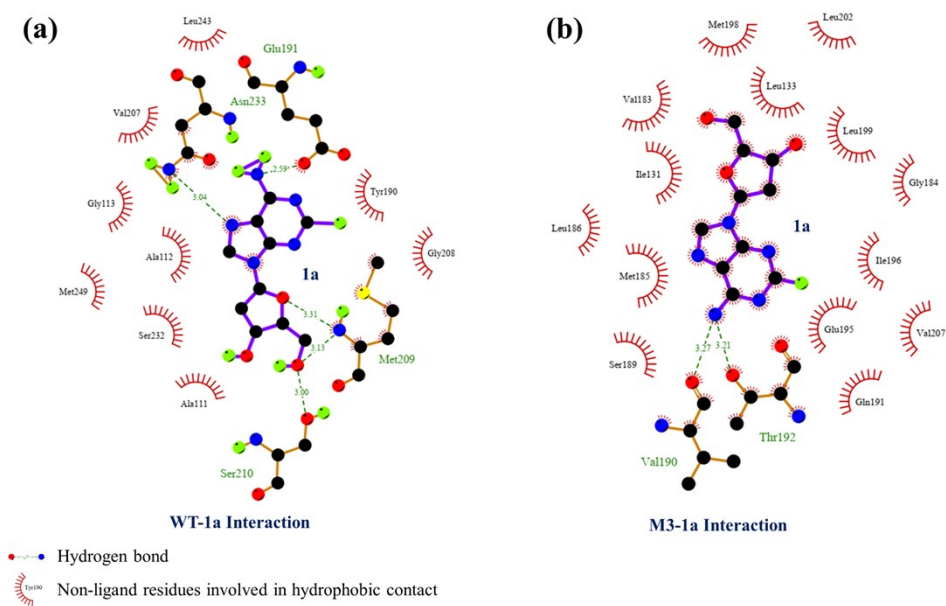

**Fig. S4** Analysis of the product 1a binding mode in the WT and M3 using MD simulations: (a) WT-1a Interaction, (b) M3-1a Interaction. The results were visualized by visual software LigPlot.

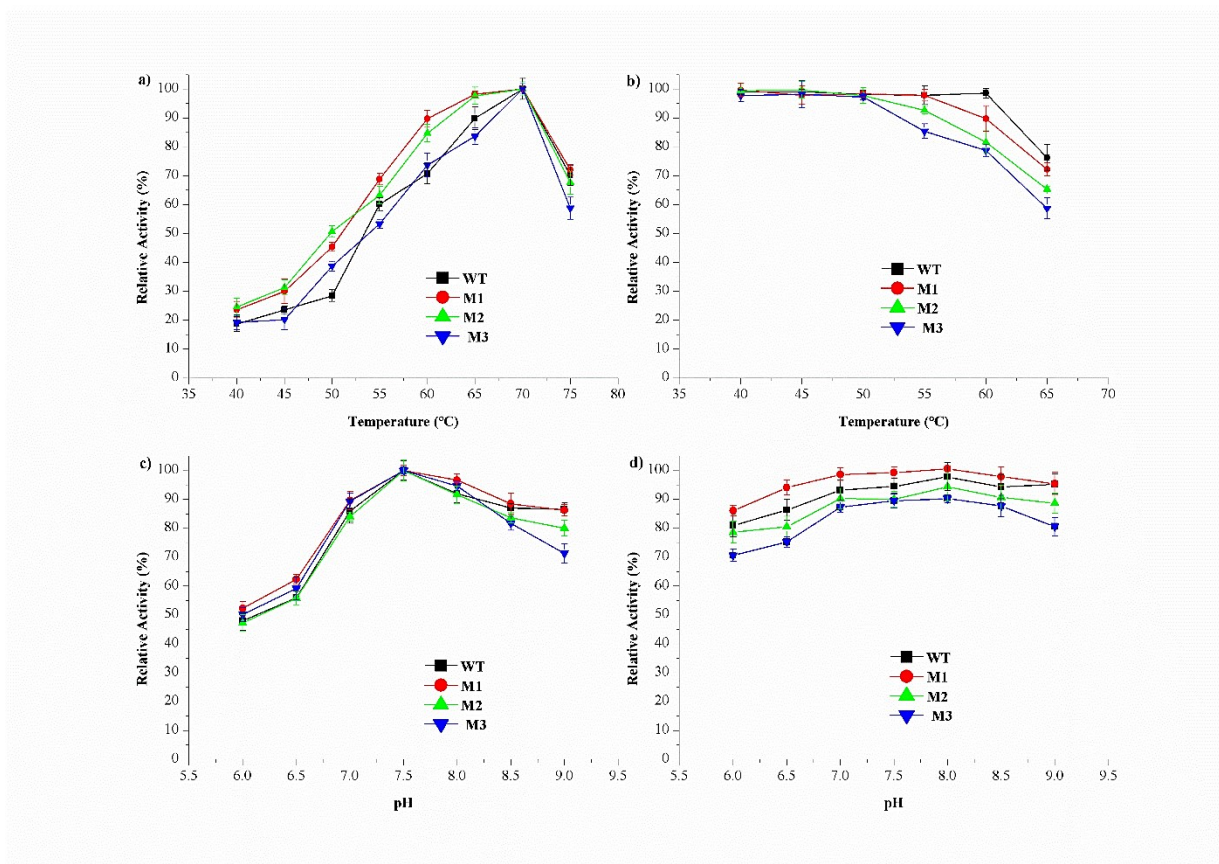

**Fig. S5** Effect of pH and temperature on the activity and stability of wild-type and mutants. **a)** The effect of temperature on activity of wild-type and its mutants was studied by changing the temperature from 40 °C to 75 °C, at pH 7.5. The highest activity was set to 100%. **b)** Thermostability of wild-type and its mutants was measured by incubating the enzyme at various temperature for 2 h. The initial activity was set to 100%. **c)** Activity of wild-type and its mutants was measured at different pH values (6.0-9.0) at 50 °C. The highest activity was set to 100%. **d)** pH stability of wild-type and its mutants was evaluated following incubation at 50 °C for 2 h at different pH values. The initial activity was set to 100%. The buffer systems were 1/15 mol/L  $\text{Na}_2\text{HPO}_4/\text{KH}_2\text{PO}_4$  (pH 6.0-9.0). Each independent experiment was duplicated for 3 times.

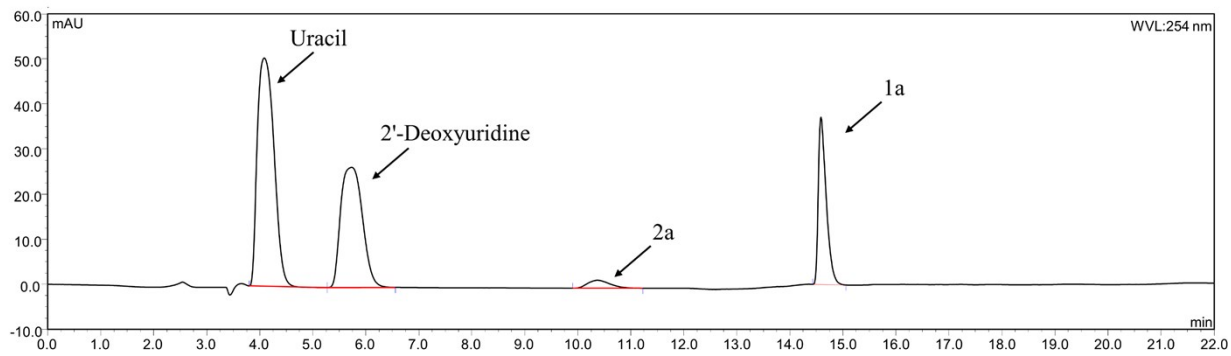

**Fig. S6** Enzymatic synthesis of 1a by HPLC analysis

Uracil (Rt=4.087 min), 2'-Deoxyuridine (Rt=5.733 min), 2a (Rt=10.373 min), 1a (Rt=14.587 min).

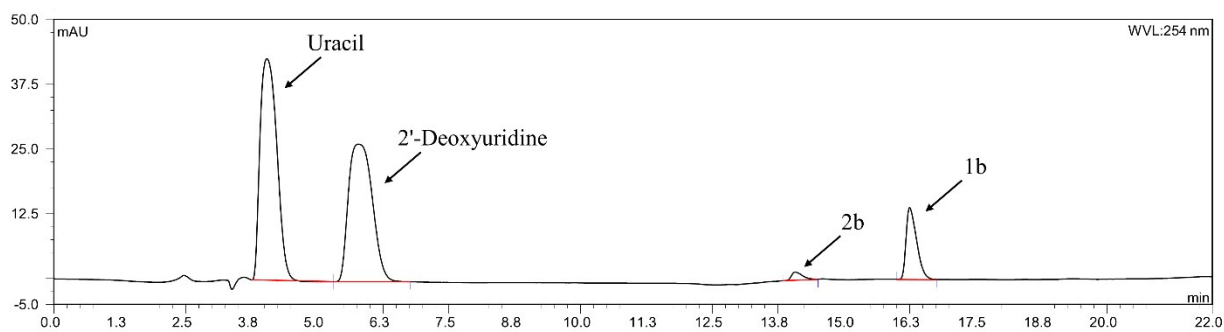

**Fig. S7** Enzymatic synthesis of 1b by HPLC analysis

Uracil (Rt=4.047 min), 2'-Deoxyuridine (Rt=5.780 min), 2b (Rt=10.07 min), 1b (Rt=16.253 min).



**Table S1.** Phosphorolysis activity of *Am*PNP and mutants toward adenosine and 2'-deoxyadenosine

| Protein | Phosphorolysis activity (U/mg) |                   | Fold change |
|---------|--------------------------------|-------------------|-------------|
|         | adenosine                      | 2'-deoxyadenosine |             |
| WT      | 2.57±0.58                      | 0.91±0.11         | 1.00        |
| M1      | 12.84±1.36                     | 6.51±1.32         | 7.15        |
| M2      | 89.42±2.65                     | 28.71±1.05        | 31.55       |
| M3      | 392.56±3.98                    | 131.72±2.78       | 144.75      |

Fold change improvement in the specific activity toward 2'-deoxyadenosine of mutants over the WT enzyme.

**Table S2.** The binding energy of WT and mutant M3 with 2a

| entry | protein | binding energy (kcal/mol) |
|-------|---------|---------------------------|
| 1     | WT      | -5.43                     |
| 2     | M3      | -6.36                     |

**Table S3.** Primers of part mutants

| Primer  | Sequence (5' to 3')                           |
|---------|-----------------------------------------------|
| N233D-F | aatgccagctgcatgtcactgatgcaggagat              |
| N233D-B | atctcctgcatcagtgacatggcagctggcatt             |
| E191Q-F | tccgctggcgtttgatagctcggccaagcata              |
| E191Q-B | tatgcttgaccgagctatcaaaccgagcggga              |
| S28A-F  | agaaataggattgattcttggtgcaggacttgggtgctgg      |
| S28A-B  | ccgacacaccaagtctgcaccaagaatcaatcctattct       |
| L30A-F  | ttcgccgaccagcacacctgctccagaaccaagaatcaatc     |
| L30A-B  | gattgattcttggttctggagcaggtgtgctggcggacgaa     |
| V56A-F  | cctttatgacctccgccgtggacaccgga                 |
| V56A-B  | ttccggtgtccacggcgggaaggtcataaagg              |
| E57A-F  | ggcctttatgacctgccaccgtggacacc                 |
| E57A-B  | gggtgtccacgggtggcaggtcataaaggcc               |
| R79A-F  | ccttcataatagtgaacgcgccctgcatggcgag            |
| R79A-B  | ctgcgccatgcagggcgctttcactattatgaagg           |
| Y83A-F  | ggccatgcccttctgcatagtgaacctgccctgcatgg        |
| Y83A-B  | ccatgcagggcaggtttcactatgcagaaggcatggcc        |
| E110A-F | caccaccgccgctgctgtcacgatttttaccacaccg         |
| E110A-B | cggtgtggataaaataatcgtgacagcagcggcgggtggtg     |
| M185A-F | ggcgtgtatgtcggg gcg cttggaccgagctat           |
| M185A-B | atagctcggccaag cgc accgacatacacgcc            |
| S189A-F | cgtggcgtctcataggccggccaagcataacc              |
| S189A-B | ggatgcttgaccggcctatgagacgccagcg               |
| Y190A-F | aattccgctggcgtctctgcgctcggccaagcataacc        |
| Y190A-B | ggatgcttgaccgagcgcagagaccgagcggaaatt          |
| I196A-F | tgtgcgaacatacagacttccgctggcgtctcatag          |
| I196A-B | ctatgagacgccagcgggaagctcgtatgttgcgcaca        |
| V207A-F | cggcgcacatgctgccgcgtcaccgcct                  |
| V207A-B | aggcgggtgacgcggcaggcatgtcgaccg                |
| G208A-F | cggtgacgcggctcgtatgtcgaccgtac                 |
| G208A-B | gtacggcgcacatagcaccgcgtcaccg                  |
| M209A-F | ttccggtacggcgtgatgcgccgaccgcgtcacc            |
| M209A-B | ggtgacgcggcggcgcacatgaccgtaccggaa             |
| S210A-F | tccggtacggcgcctatgccgaccg                     |
| S210A-B | cggcggcgtggcggaccgtaccgga                     |
| T211A-F | cacttccggtacggccgacatgccgac                   |
| T211A-B | gtcggcatgtcggccgtaccggaagt                    |
| C230A-F | gctgcatatcactgatggcggagatgcccaatacac          |
| C230A-B | gtgtattggcctatccgccatcagtgatattggcagc         |
| L243A-F | atacttcatcgtgtgatgccggctgaggtaaaatgc          |
| L243A-B | gcattttacctcagccggcaccacgatgaagtgat           |
| S244A-F | ccatcacttcatcgtgtgtaaacggctgaggtaaaat         |
| S244A-B | atfttacctcagccgttagcacacgatgaagtgatgg         |
| H245A-F | ggctgtttccatcacttcatccgctgataacggctgaggtaaaat |
| H245A-B | atfttacctcagccgttatcagcggatgaagtgatggaacagcc  |

V248A-F gctgtttccatcgcttcatcgtgtgataacggct  
V248A-B agccgttatcacacgatgaagcgatggaaacagc  
M249A-F tgaccttttcggctgtttccgccacttcatcgtgtgataac  
M249A-B gttatcacacgatgaagtggcggaacagccgaaaaggta  
Y190F-F ttccgctggcgtctcaaagctcgggtccaagcat  
Y190F-B atgcttggaccgagctttgagacgccagcggaa  
Y190V-F ttccgctggcgtctcaacgctcgggtccaagcat  
Y190V-B atgcttggaccgagcgttgagacgccagcggaa  
Y190I-F ttccgctggcgtctcaatgctcgggtccaagcat  
Y190I-B atgcttggaccgagcattgagacgccagcggaa  
Y190L-F ttccgctggcgtctcaaggctcgggtccaagcat  
Y190L-B atgcttggaccgagccttgagacgccagcggaa  
Y190M-F ttccgctggcgtctccatgctcgggtccaagcat  
Y190M-B atgcttggaccgagcatggagacgccagcggaa  
Y190C-F ttccgctggcgtctcacagctcgggtccaagcat  
Y190C-B atgcttggaccgagctgtgagacgccagcggaa  
M185Y-F ggcgtgtatgtcggtagcttggaccgagctat  
M185Y-B atagctcgggtccaagctacccgacatacacgc  
M185T-F gcgtgtatgtcggtagcttggaccgagcta  
M185T-B tagctcgggtccaagctacccgacatacacgc  
S189R-F gctggcgtctcatagcgggtccaagcatac  
S189R-B gtatgcttggaccgcgctatgagacgccagc  
I196Y-F tgtgcgcaacatacगतattccgctggcgtctcatag  
I196Y-B ctatgagacgccagcggaatatcगतatggtgcgaca  
C230L-F cagctgccatatactgatcagggatgcccaatacacgc  
C230L-B gcgtgtattggcatctccctgatcगतatggcagctg  
M249G-F cttttcggctgtttctcccacttcatcगतगत  
M249G-B atcacacgatgaagtgggagaaacagccgaaaagg  
M249F-F cttttcggctgtttcaaacacttcatcगतगत  
M249F-B atcacacgatgaagtgttgaaacagccgaaaagg  
M249L-F cttttcggctgtttctagcacttcatcगतगत  
M249L-B atcacacgatgaagtctagaaacagccgaaaagg  
M249I-F gacctttcggctgtttcaatcacttcatcगतगतataa  
M249I-B ttatcacacgatgaagtgattgaaacagccgaaaaggta

---
